# Supplementary material for: The Impact of a Multicomponent Platform Intervention on the Daily Lives of Older Adults
Source: MDPI journal article supplement (doi:10.3390/healthcare11243102), 2023-12-05
Supplement: s1 [file s1]

**Table S1.** Baseline characteristics and test scores before the start of the experimentation (T0), at the midterm of the trial (T1) and at the end of the trial (T2) of the users

|                               | User Code |      |      |      |      |      |      |      |      |      |      |      |      |      |      |      |      |      |      |      |      |      |      |      |      |
|-------------------------------|-----------|------|------|------|------|------|------|------|------|------|------|------|------|------|------|------|------|------|------|------|------|------|------|------|------|
|                               | U_01      | U_02 | U_03 | U_04 | U_05 | U_06 | U_07 | U_08 | U_09 | U_10 | U_11 | U_12 | U_13 | U_14 | U_15 | U_16 | U_17 | U_18 | U_19 | U_20 | U_21 | U_22 | U_23 | U_24 | U_25 |
| <b>Users' Characteristics</b> |           |      |      |      |      |      |      |      |      |      |      |      |      |      |      |      |      |      |      |      |      |      |      |      |      |
| Age                           | 81        | 78   | 88   | 86   | 81   | 84   | 84   | 81   | 90   | 74   | 78   | 83   | 81   | 96   | 73   | 82   | 65   | 80   | 72   | 80   | 81   | 77   | 85   | 94   | 75   |
| Female Gender                 | 2         | 2    | 2    | 2    | 2    | 2    | 2    | 1    | 2    | 2    | 1    | 2    | 2    | 1    | 1    | 2    | 2    | 2    | 1    | 1    | 1    | 2    | 1    | 2    | 1    |
| MMSE                          | 21        | 27   | 26   | 25   | 24   | 22   | 23   | 27   | 26   | 24   | 27   | 25   | 26   | 27   | 27   | 26   | 27   | 27   | 27   | 27   | 29   | 24   | 27   | 24   | 26   |
| FAC                           | 5         | 5    | 3    | 5    | 5    | 5    | 5    | 5    | 5    | 4    | 5    | 5    | 5    | 5    | 5    | 4    | 4    | 5    | 5    | 5    | 5    | 5    | 5    | 4    | 5    |
| Barthel                       | 20        | 20   | 7    | 20   | 20   | 20   | 20   | 20   | 20   | 15   | 20   | 20   | 20   | 20   | 20   | 19   | 20   | 20   | 20   | 20   |      | 20   | 20   | 17   | 20   |
| <b>T0</b>                     |           |      |      |      |      |      |      |      |      |      |      |      |      |      |      |      |      |      |      |      |      |      |      |      |      |
| SF-12 Physical Score          | 15        | 15   | 12   | 15   | 14   | 15   | 15   | 15   | 15   | 9    | 15   | 15   | 14   | 15   | 15   | 9    | 14   | 12   | 12   | 15   | 12   | 10   | 14   | 8    | 11   |
| SF-12 Mental Score            | 16        | 20   | 20   | 18   | 15   | 17   | 17   | 19   | 17   | 17   | 16   | 17   | 21   | 20   | 18   | 19   | 19   | 19   | 18   | 17   | 20   | 20   | 15   | 17   | 11   |
| Who-5                         | 76        | 76   | 80   | 76   | 60   | 80   | 72   | 64   | 44   | 32   | 84   | 52   | 88   | 48   | 88   | 48   | 72   | 64   | 76   | 88   | 88   | 48   | 60   | 72   | 64   |
| EQ-5D-5L                      | 70        | 70   | 50   | 90   | 70   | 90   | 70   | 70   | 70   | 50   | 80   | 99   | 65   | 50   | 90   | 50   | 80   | 60   | 60   | 80   | 85   | 70   | 70   | 70   | 70   |
| GSE Total Score               | 33        | 34   | 22   | 29   | 32   | 23   | 26   | 32   | 24   | 10   | 30   | 27   | 22   | 30   | 32   | 26   | 20   | 28   | 36   | 27   | 40   | 30   | 33   | 29   | 34   |
| <b>T1</b>                     |           |      |      |      |      |      |      |      |      |      |      |      |      |      |      |      |      |      |      |      |      |      |      |      |      |
| SF-12 Physical Score          | 13        | 15   | 12   | 15   | 11   | 15   | 15   | 15   | 14   | 9    | 15   | 15   | 14   | 12   | 15   | 9    | 14   | 12   | 12   | 15   | 13   | 11   | 9    | 11   | 12   |
| SF-12 Mental Score            | 15        | 20   | 20   | 17   | 15   | 17   | 17   | 17   | 14   | 17   | 16   | 18   | 20   | 19   | 18   | 19   | 18   | 19   | 18   | 17   | 18   | 18   | 18   | 22   | 15   |
| Who-5                         | 64        | 76   | 80   | 80   | 64   | 80   | 72   | 76   | 68   | 32   | 88   | 72   | 64   | 64   | 84   | 44   | 76   | 64   | 76   | 88   | 88   | 84   | 48   | 48   | 72   |
| EQ-5D-5L                      | 70        | 70   | 50   | 90   | 70   | 90   | 70   | 75   | 70   | 50   | 80   | 75   | 60   | 70   | 85   | 50   | 70   | 60   | 60   | 80   | 85   | 60   | 65   | 80   | 80   |
| GSE Total Score               | 26        | 33   | 23   | 30   | 32   | 23   | 25   | 31   | 30   | 10   | 29   | 34   | 22   | 30   | 36   | 26   | 20   | 28   | 36   | 27   | 40   | 30   | 30   | 28   | 31   |
| SUS Score                     | 22.5      | 70   | 52.5 | 77.5 | 52.5 | 60   | 45   | 57.5 | 50   | 22.5 | 75   | 82.5 | 40   | 80   | 92.5 | 75   | 75   | 67.5 | 77.5 | 95   | 55   | 100  | 40   | 100  | 30   |
| QUEST Score Watch             | 21        | 35   | 29   | 30   | 19   | 29   | 27   | 32   | 21   | 26   | 31   | 32   | 25   | 32   | 38   | 34   | 38   | 35   | 38   | 40   | 36   | 36   | 30   | 30   | 36   |
| QUEST Score Kit               | 21        | 37   | 32   | 35   | 29   | 33   | 32   | 38   | 37   | 32   | 32   | 40   | 40   | 37   | 40   | 40   | 40   | 40   | 38   | 40   | 31   |      |      |      |      |
| <b>T2</b>                     |           |      |      |      |      |      |      |      |      |      |      |      |      |      |      |      |      |      |      |      |      |      |      |      |      |
| SF-12 Physical Score          | 15        | 14   | 12   | 15   | 10   | 15   | 15   | 15   | 14   | 9    | 15   | 15   | 14   | 13   | 15   | 11   | 14   | 12   | 12   | 15   | 14   | 9    | 10   | 12   | 10   |
| SF-12 Mental Score            | 14        | 20   | 20   | 18   | 15   | 17   | 17   | 17   | 14   | 17   | 18   | 18   | 21   | 18   | 18   | 19   | 18   | 19   | 18   | 17   | 19   | 15   | 15   | 20   | 14   |
| Who-5                         | 60        | 76   | 80   | 76   | 64   | 80   | 80   | 76   | 68   | 32   | 84   | 72   | 52   | 64   | 84   | 52   | 76   | 64   | 76   | 88   | 80   | 60   | 60   | 48   | 84   |

|                 |      |      |      |      |    |    |    |      |    |      |    |      |    |      |      |      |    |      |      |    |    |    |     |    |      |
|-----------------|------|------|------|------|----|----|----|------|----|------|----|------|----|------|------|------|----|------|------|----|----|----|-----|----|------|
| EQ-5D-5L        | 70   | 70   | 50   | 90   | 70 | 90 | 75 | 80   | 70 | 50   | 85 | 80   | 60 | 70   | 90   | 60   | 80 | 60   | 60   | 80 | 80 | 70 | 100 | 80 | 80   |
| GSE Total Score | 30   | 34   | 23   | 30   | 25 | 24 | 26 | 31   | 30 | 10   | 32 | 34   | 22 | 30   | 32   | 27   | 20 | 28   | 36   | 27 | 39 | 33 | 34  | 28 | 38   |
| SUS Score       | 27.5 | 72.5 | 52.5 | 77.5 | 45 | 50 | 50 | 57.5 | 50 | 22.5 | 70 | 82.5 | 40 | 67.5 | 92.5 | 82.5 | 75 | 67.5 | 77.5 | 95 | 60 | 95 | 90  | 50 | 82.5 |
| QUEST Score     |      |      |      |      |    |    |    |      |    |      |    |      |    |      |      |      |    |      |      |    |    |    |     |    |      |
| Watch           | 28   | 35   | 29   | 31   | 26 | 27 | 27 | 32   | 26 | 26   | 31 | 32   | 25 | 32   | 38   | 34   | 38 | 35   | 38   | 40 | 38 | 39 | 33  | 34 | 38   |
| QUEST Score     |      |      |      |      |    |    |    |      |    |      |    |      |    |      |      |      |    |      |      |    |    |    |     |    |      |
| Kit             | 29   | 37   | 32   | 38   | 32 | 34 | 34 | 38   | 36 | 32   | 32 | 40   | 40 | 40   | 40   | 40   | 40 | 40   | 38   | 40 | 35 | 35 |     |    | 26   |
